# Supplementary material
Source: PubMed Central journal article supplement (PMC6429573)
Supplement: DS_10.1177_0022034517732754.pdf [file DS_10.1177_0022034517732754.pdf]

## **Complex Intratissue Microbiota Forms Biofilms in Periodontal Lesions**

K. Baek, S. Ji, and Y. Choi

### **Appendix**

#### **Appendix Methods**

##### **Real-time PCR**

Real-time PCR was performed in a 20 µl reaction mix containing 2 µl of bacterial genomic DNA, SYBR *Premix Ex Taq*, ROX Reference Dye II (Takara Bio, Otsu, Japan), and each primer. Universal (forward: 5'-AGTCACTGACGAGTTTGATCMTGGCTCAG-3' and reverse: 5'-CAGTGACTACWTTACCGCGGCTGCTGG-3') and *P. gingivalis*-specific primers (Baek et al. 2013) targeting the bacterial 16S rRNA gene were used. *P. gingivalis* ATCC 33277 genomic DNA was used to generate standard curves.

##### **Appendix Reference**

Baek KJ, Choi Y, Ji S. 2013. Gingival fibroblasts from periodontitis patients exhibit inflammatory characteristics in vitro. *Arch Oral Biol.* 58(10):1282–1292

**Appendix Table. The demographic and clinical characteristics of subjects**

| Clinical characteristics                       | P1          | P2          | P3          | P4        | P5          | P6         | P7          | Mean        |
|------------------------------------------------|-------------|-------------|-------------|-----------|-------------|------------|-------------|-------------|
| <b>Age (years)</b>                             | 53          | 60          | 55          | 49        | 73          | 75         | 53          | 59.0±10.3   |
| <b>Gender</b>                                  | M           | F           | F           | M         | M           | M          | M           |             |
| <b>Smoking</b>                                 | C           | N           | N           | C         | N           | N          | C           |             |
| <b>No. of total teeth</b>                      | 26          | 27          | 26          | 25        | 25          | 28         | 28          | 26.4 ± 1.3  |
| <b>Marginal bone loss (%)<sup>a, b</sup></b>   | 21.6 ± 18.4 | 28.5 ± 11.5 | 35.5 ± 17.6 | 22 ± 11.3 | 42.9 ± 16.2 | 27 ± 15.6  | 28.8 ± 13.6 | 29.5 ± 16.4 |
| <b>Bacteria-sampled site</b>                   |             |             |             |           |             |            |             |             |
| PD (mm)                                        | 7           | 5           | 8           | 5         | 8           | 8          | 7           | 6.9±1.0     |
| CAL (mm)                                       | 9           | 6           | 11          | 7         | 9           | 10         | 8           | 8.6±1.7     |
| <b>Tissue-sampled sites for pyrosequencing</b> |             |             |             |           |             |            |             |             |
| PD (mm) <sup>a</sup>                           | 5.0 ± 1.2   | 6.7 ± 0.9   | 8.0 ± 0.6   | 5.0 ± 0.0 | 7.7 ± 0.3   | 9.3 ± 0.7  | 5.3 ± 0.9   | 6.8 ± 0.4   |
| CAL (mm) <sup>a</sup>                          | 7.0 ± 1.2   | 7.7 ± 0.9   | 11.0 ± 0.6  | 7.0 ± 0.0 | 8.7 ± 0.3   | 11.0 ± 0.7 | 6.3 ± 0.9   | 8.5 ± 0.5   |
| <b>Tissue-sampled sites for histology</b>      |             |             |             |           |             |            |             |             |
| PD (mm) <sup>a</sup>                           | 4.0 ± 0.6   | 5.3 ± 0.3   | No sample   | 5.0 ± 0.0 | 7.7 ± 0.3   | 6.3 ± 0.7  | 8.3 ± 1.7   | 6.4 ± 0.4   |
| CAL (mm) <sup>a</sup>                          | 5.0 ± 0.6   | 6.3 ± 0.3   | No sample   | 6.0 ± 0.0 | 8.7 ± 0.3   | 7.3 ± 0.7  | 9.3 ± 1.7   | 7.7 ± 0.5   |

C: current smoker; N: never smoker

<sup>a</sup>Expressed as mean ± SD

<sup>b</sup>Represents full-mouth data obtained from panoramic radiographs taken before scaling and root debridement.

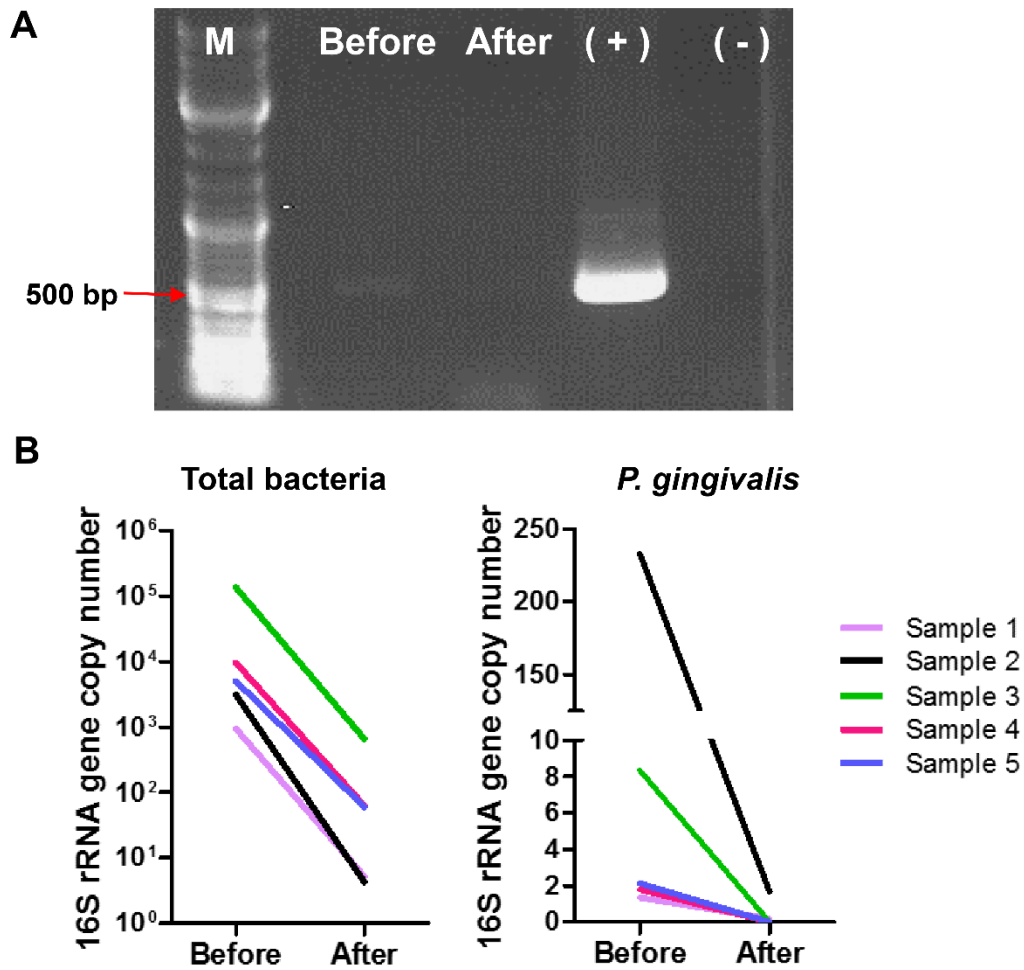

**Appendix Figure 1. Efficiency of treatment with lysozyme and DNase I.** (A) Bacterial genomic DNA was extracted from wash solutions of before and after DNase I treatment, and the bacterial 16S rRNA gene was amplified by PCR. Genomic DNA from *P. gingivalis* was used as a positive control. (B) The 16S rRNA gene copies of total bacteria and *P. gingivalis* were estimated by Real-time PCR using additional plaque samples, treatment with lysozyme and DNase I.

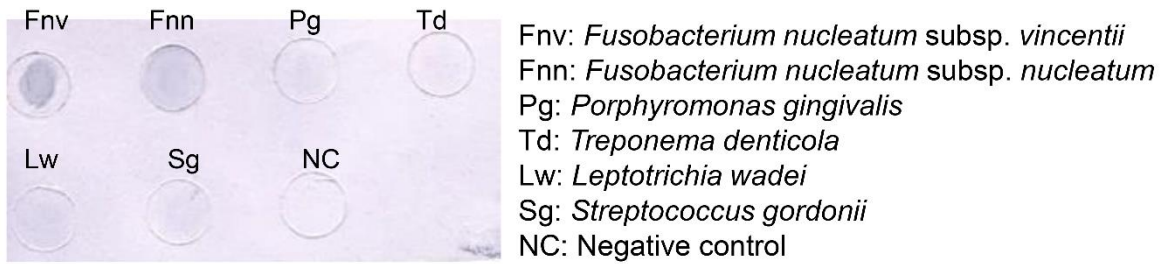

**Appendix Figure 2. Specificity test of *F. nucleatum*-specific probe.** The specificity of digoxigenin-labeled probe for *F.uncleatum* was confirmed by dot blotting using six bacterial genomic DNA.

**A**

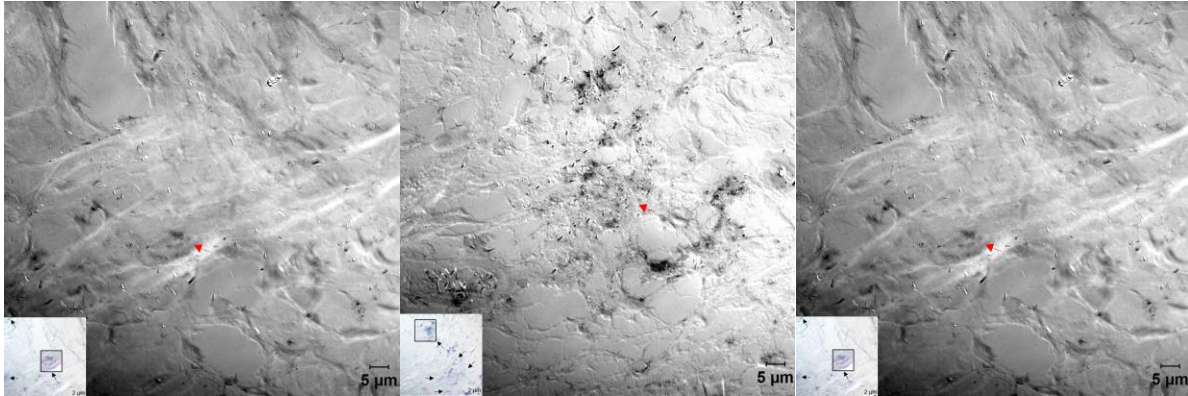

**B**

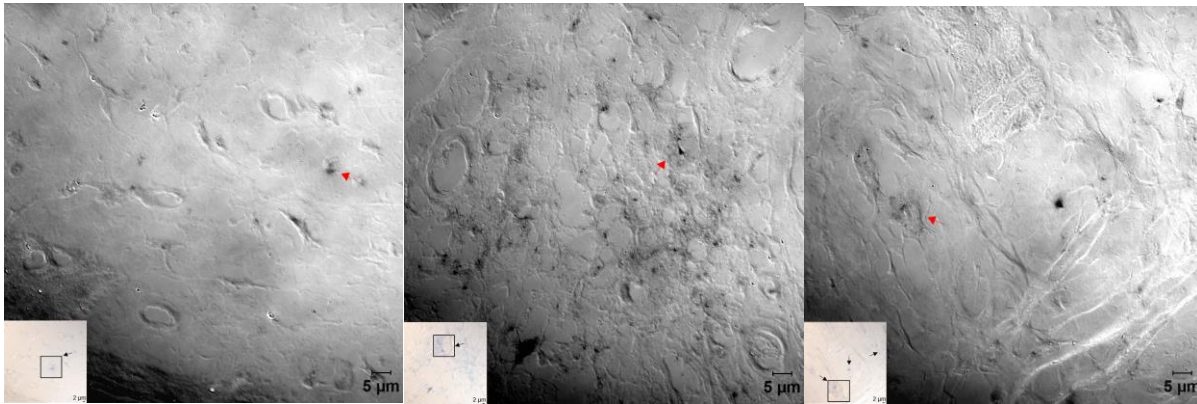

**C**

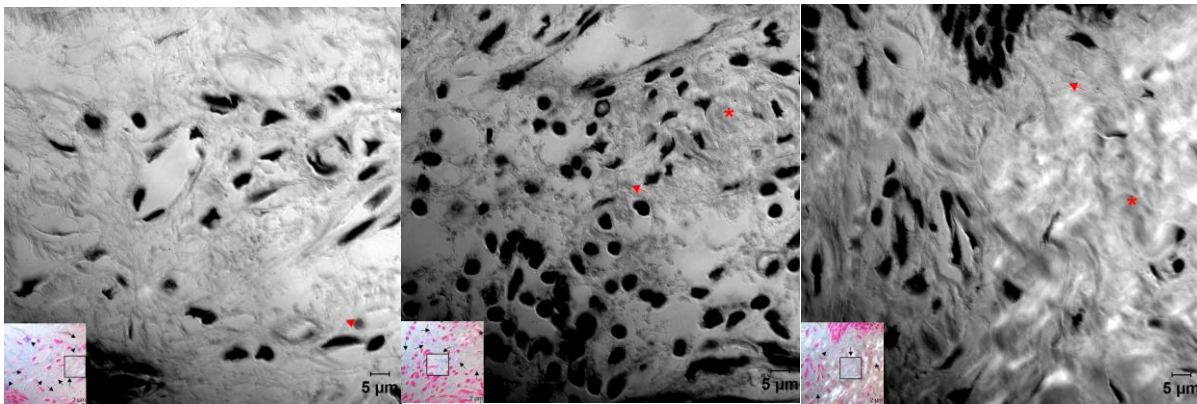

**Appendix Figure 3. Images with z-stack.** The areas a, b, and c shown in Figure 3B – D were examined by confocal microscopy with z-stack, then z-stack animation has been produced in GIF format.
